# Supplementary material
Source: MDPI journal article supplement (https://www.mdpi.com/2073-445X/10/11/1251)
Supplement: s1 [file s1]

## **Assessment of Land Cover Dynamics and Drivers of Urban Expansion using Geospatial and Logistic Regression Approach in Wa Municipal, Ghana**

**Mawuli Asempah\*, Wahib Sahwan, Brigitta Schütt**

Physical Geography, Institute of Geographical Sciences, Freie Universität Berlin, Malteserstraße 74-100, 12449 Berlin, Germany

\* Correspondence: mawuli.asempah@fu-berlin.de, Tel.: (+49-30-838-70239)

### **Supplementary Note 1 – The Dependent and Independent variables for assessing the Urban expansion.**

Maps of dependent and independent variables employed in assessing the drivers of urban expansion from 1990-2001, 2001-2010, 2010-2020 and 1990-2020. (see section 3.4)

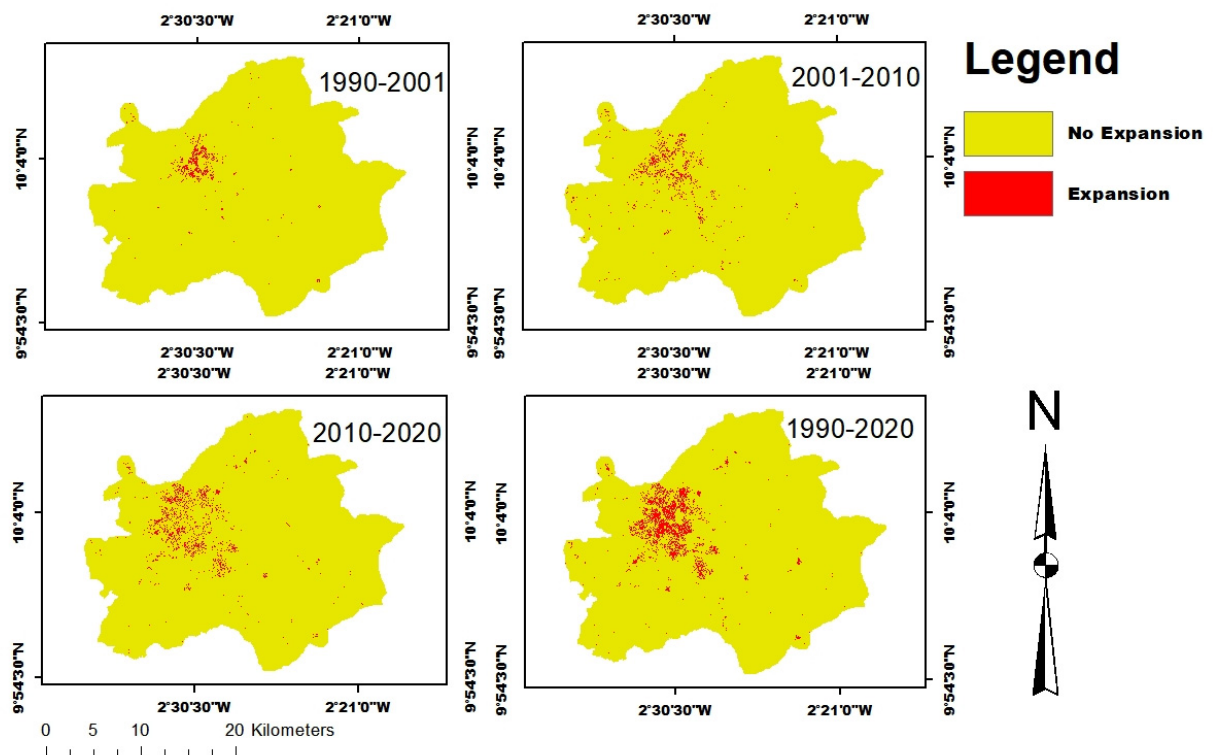

**Figure S1.** The Raster layer of urban expansion obtained from change detection for all the time slices and served as dependant variables in the logistic regression analysis. The dichotomous variables were 1= expansion and 0=no expansion.

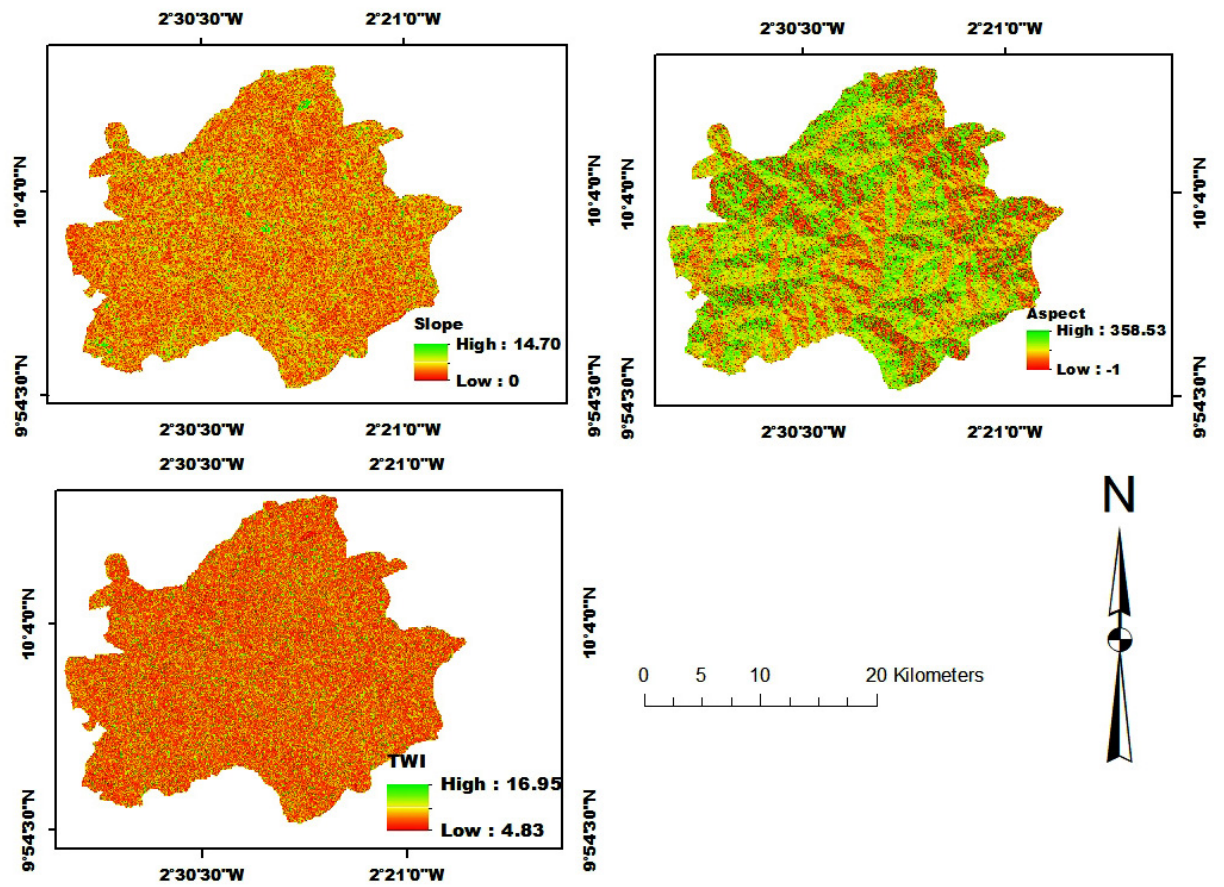

**Figure S2.** Raster layers of the topographic independent variables explored for relationship with urban expansion. They include: slope, Aspect and Topographic wetness index (TWI).

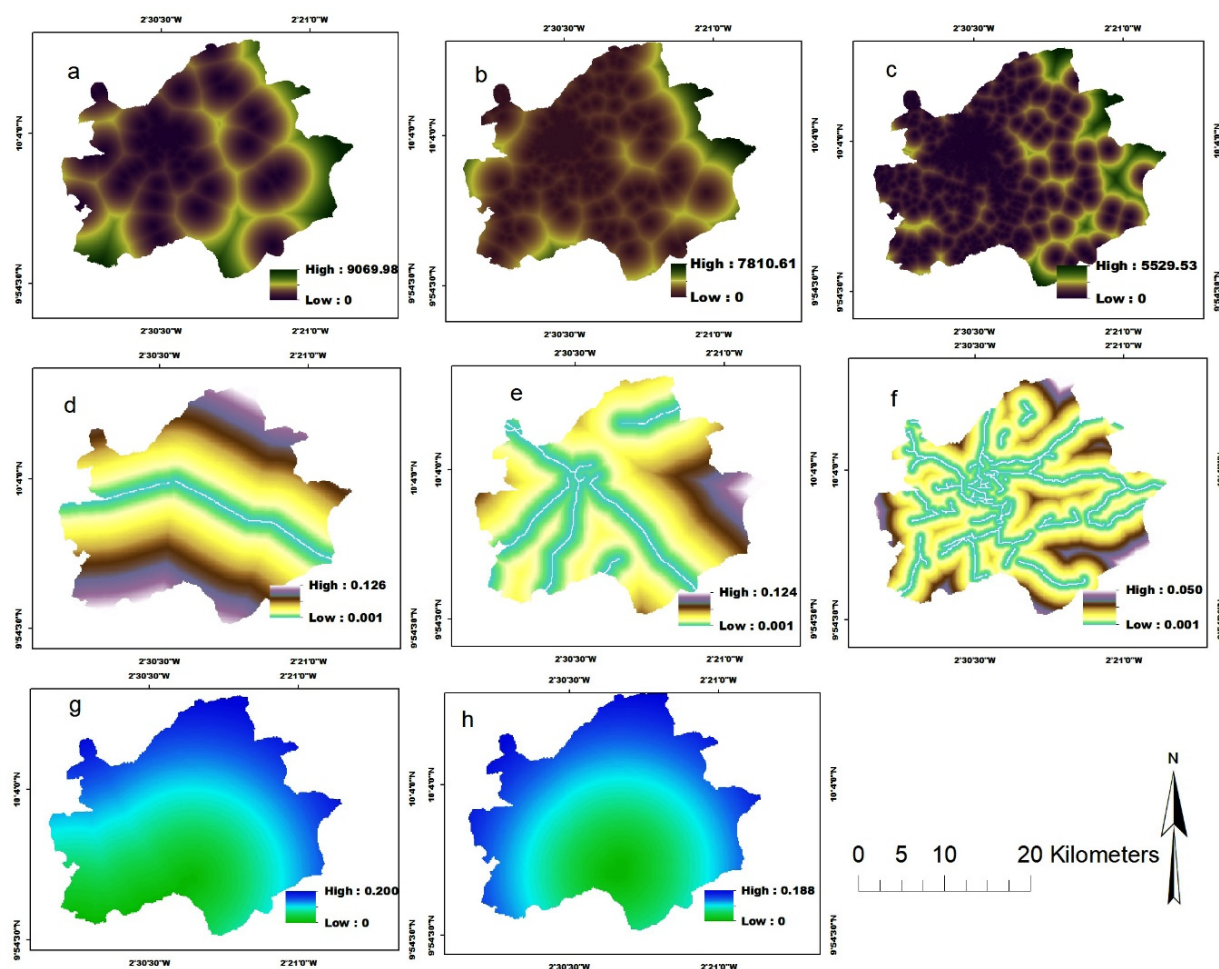

**Figure S3.** Raster layers of the location independent variables explored for their relationship with urban expansion. (a= Distance to settlement in 1990, b= Distance to settlement in 2001, c= Distance to settlement in 2010, d= distance to primary road, e= distance to tertiary road, f=distance to unclassified road, g= distance to river, h= distance to stream).

## Supplementary Note 2 – Further details of Landsat satellite images used in the LULC classification.

Table S1. Landsat satellite used for classification, their scene ID number and the time of acquisition

| Satellite Name | Scene ID number       | Date of Acquisition | Time of Acquisition |
|----------------|-----------------------|---------------------|---------------------|
| Landsat 5      | LT51950531990285MPS00 | October 12, 1990    | 09:46:28.2240060Z   |
| Landsat 7      | LE71950532001307EDC00 | November 03, 2001   | 10:15:13.1215482Z   |
| Landsat 7      | LE71950532010316ASN00 | November 12, 2010   | 10:19:33.0561608Z   |
| Landsat 8      | LC81950532020320LGN00 | November 15, 2020   | 10:27:08.9585710Z   |
